# Supplementary material
Source: HighWire-hosted journal article supplement (https://tobaccocontrol.bmj.com/highwire/filestream/165029/field_highwire_adjunct_files/0/tc-2021-057228supp001_data_supplement.pdf)

**Figure S1: Multistage Sampling Design for Study Countries**

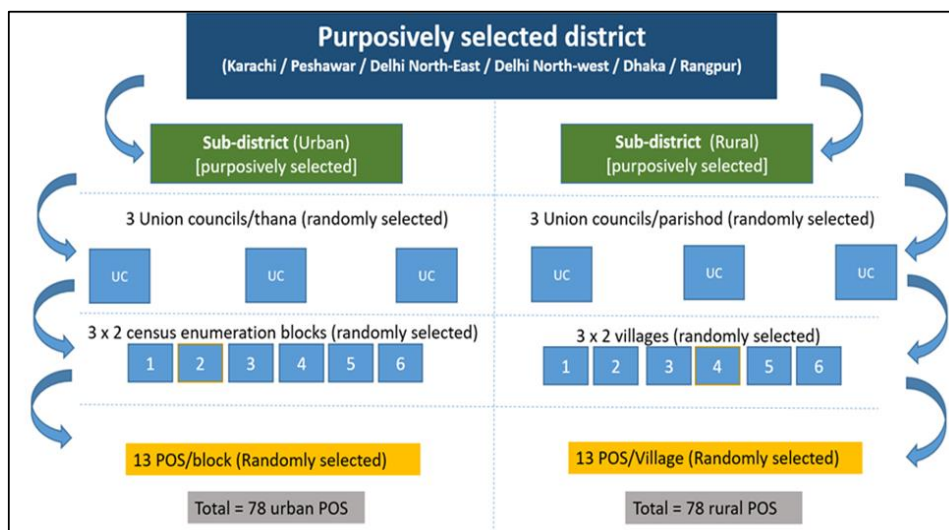

Source: Adapted from Zohaib et al. (2020)

Supplement: tc-2021-057228supp001_data_supplement.pdf [file tc-2021-057228supp001_data_supplement.pdf]
